# Supplementary material
Source: publisher figshare collection journal article supplement (https://tandf.figshare.com/ndownloader/files/14392016)
Supplement: Supplementary file 1 [file 14392016]

Supplement file

(a)

(b)

(c)

Figure S1 – Flux as a function of time for membrane M01. Apitoxin content = 1 g/L, P = 1 bar, flow rate = 0.08 m/s, 26oC. a) Test 1, b) Test 2, c) Test 3.

(a)

(b)

(c)

Figure S2 – Flux as a function of time for membrane M02. Apitoxin content = 0.6 g/L, P = 1 bar, flow rate = 0.08 m/s, 26oC. a) Test 1, b) Test 2, c) Test 3.

(a)

(b)

(c)

Figure S3 – Flux as a function of time for membrane M03. Apitoxin content = 0.2 g/L, P = 1 bar, flow rate = 0.08 m/s, 26oC. a) Test 1, b) Test 2, c) Test 3.
